# Supplementary material for: Impact of acidity and surface-modulated acid dissociation on cloud response to organic aerosol
Source: Copernicus journal article supplement (doi:10.5194/acp-24-1467-2024), 2024-01-31
Supplement: Supplementary file 1 [file acp-24-1467-2024-supplement.pdf]

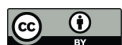

*Supplement of*

## **Impact of acidity and surface-modulated acid dissociation on cloud response to organic aerosol**

**Gargi Sengupta et al.**

*Correspondence to:* Nønne L. Prisle ([nonne.prisle@oulu.fi](mailto:nonne.prisle@oulu.fi))

The copyright of individual parts of the supplement might differ from the article licence.

## S1 Dissociation degree and van't Hoff factor

**Table S1.** The organic aerosol van't Hoff factor ( $i_{\text{OA}}$ ) and dissociation degree ( $\alpha$ , in parenthesis) for decanoic acid and malonic acid, respectively, corresponding to bulk acid dissociation ( $\text{p}K_a^{\text{bulk}}$ ) and surface modulated suppressed organic acid dissociation ( $\text{p}K_a^{\text{bulk}} + 1$  and  $\text{p}K_a^{\text{bulk}} + 2$ ) considering initial organic mass fractions  $\chi_{\text{OA}} = \{0.2, 0.4, 0.6, 0.8, 1\}$ .

| Malonic acid       |                                                    |                                                        |                                                        |                                         |
|--------------------|----------------------------------------------------|--------------------------------------------------------|--------------------------------------------------------|-----------------------------------------|
| $\chi_{\text{OA}}$ | $i_{\text{OA}}(\alpha), \text{p}K_a^{\text{bulk}}$ | $i_{\text{OA}}(\alpha), \text{p}K_a^{\text{bulk}} + 1$ | $i_{\text{OA}}(\alpha), \text{p}K_a^{\text{bulk}} + 2$ | $i_{\text{OA}}(\alpha), \text{no diss}$ |
| 0.2                | 2.12 (0.560)                                       | 1.90 (0.450)                                           | 1.70 (0.350)                                           | 1 (0)                                   |
| 0.4                | 2.064 (0.532)                                      | 1.85 (0.425)                                           | 1.66 (0.331)                                           | 1 (0)                                   |
| 0.6                | 2.02 (0.510)                                       | 1.81 (0.405)                                           | 1.63 (0.315)                                           | 1 (0)                                   |
| 0.8                | 1.996 (0.498)                                      | 1.770 (0.385)                                          | 1.590 (0.295)                                          | 1 (0)                                   |
| 1                  | 1.960 (0.480)                                      | 1.720 (0.360)                                          | 1.560 (0.280)                                          | 1 (0)                                   |
| Decanoic acid      |                                                    |                                                        |                                                        |                                         |
| $\chi_{\text{OA}}$ | $i_{\text{OA}}(\alpha), \text{p}K_a^{\text{bulk}}$ | $i_{\text{OA}}(\alpha), \text{p}K_a^{\text{bulk}} + 1$ | $i_{\text{OA}}(\alpha), \text{p}K_a^{\text{bulk}} + 2$ | $i_{\text{OA}}(\alpha), \text{no diss}$ |
| 0.2                | 1.993 (0.993)                                      | 1.905 (0.905)                                          | 1.720 (0.720)                                          | 1 (0)                                   |
| 0.4                | 1.989 (0.989)                                      | 1.890 (0.890)                                          | 1.715 (0.715)                                          | 1 (0)                                   |
| 0.6                | 1.985 (0.985)                                      | 1.875 (0.875)                                          | 1.705 (0.705)                                          | 1 (0)                                   |
| 0.8                | 1.981 (0.981)                                      | 1.845 (0.845)                                          | 1.680 (0.680)                                          | 1 (0)                                   |
| 1                  | 1.978 (0.978)                                      | 1.823 (0.823)                                          | 1.650 (0.650)                                          | 1 (0)                                   |

## S2 Hydrogen ion concentration in the aerosol with varying ionic strengths

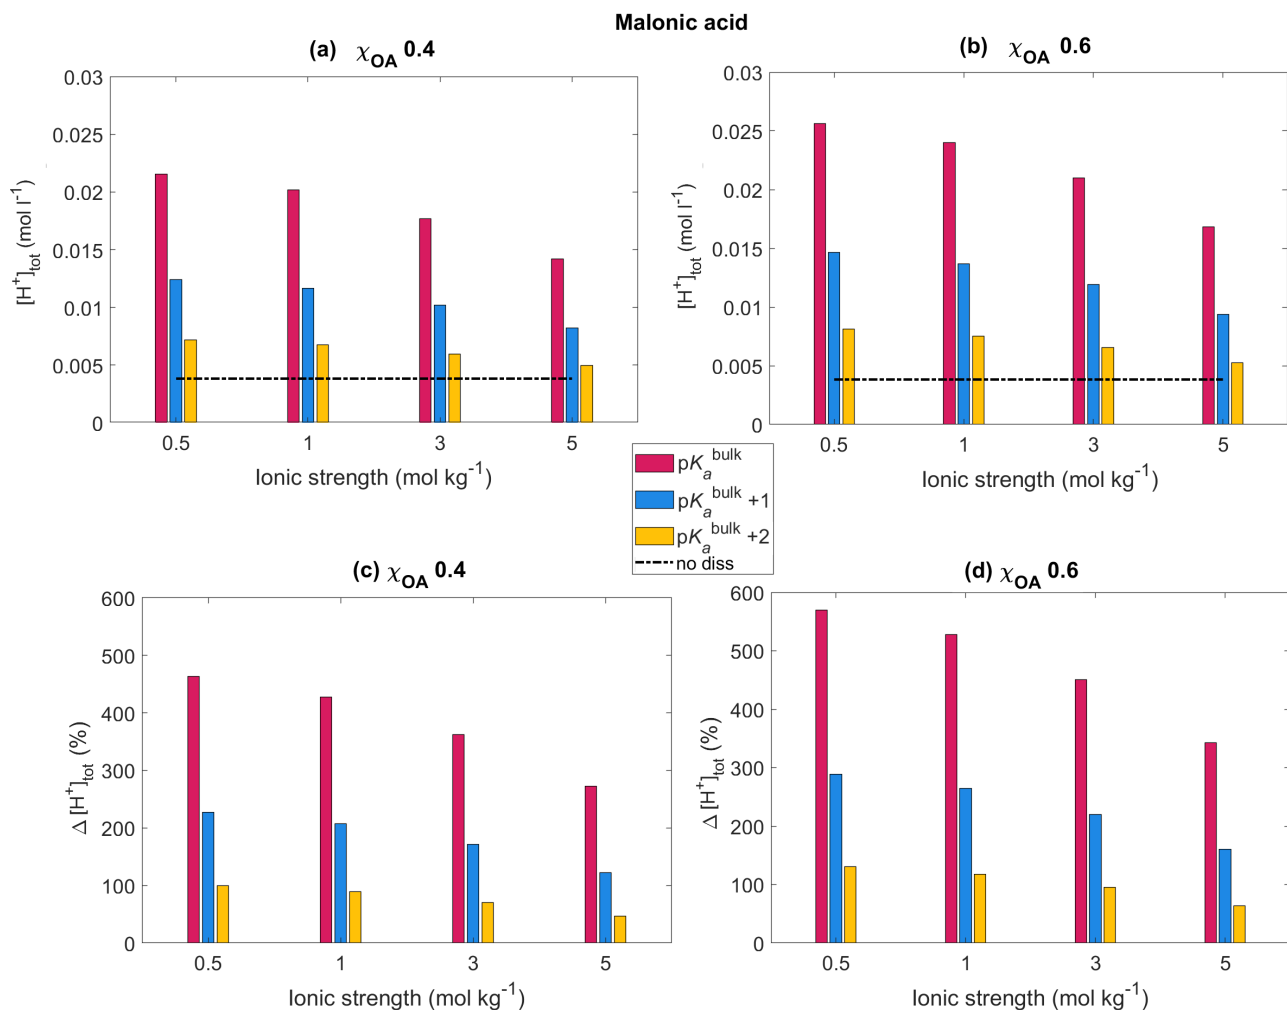

**Figure S1.** Total hydrogen ion concentration,  $[\text{H}^+]_{\text{tot}}$ , and the relative change in hydrogen ion concentration with respect to the 'no diss' ( $\Delta[\text{H}^+]_{\text{tot}}$ ) for varying ionic strengths ( $I$ ), in the aqueous aerosol population with sizes between  $D_{\text{wet}} = 0.317 - 40 \mu\text{m}$ , after 1 hour of simulation time, considering the entire OA fraction as malonic acid and initial OA mass fractions,  $\chi_{\text{OA}} = 0.4$  (a,c) and  $0.6$  (b,d), with varying  $pK_a$  corresponding to representations of bulk ( $pK_a^{\text{bulk}}$  pink,) and surface modulated ( $pK_a^{\text{bulk}+1}$ , blue, and  $pK_a^{\text{bulk}+2}$ , yellow) organic acid dissociation.

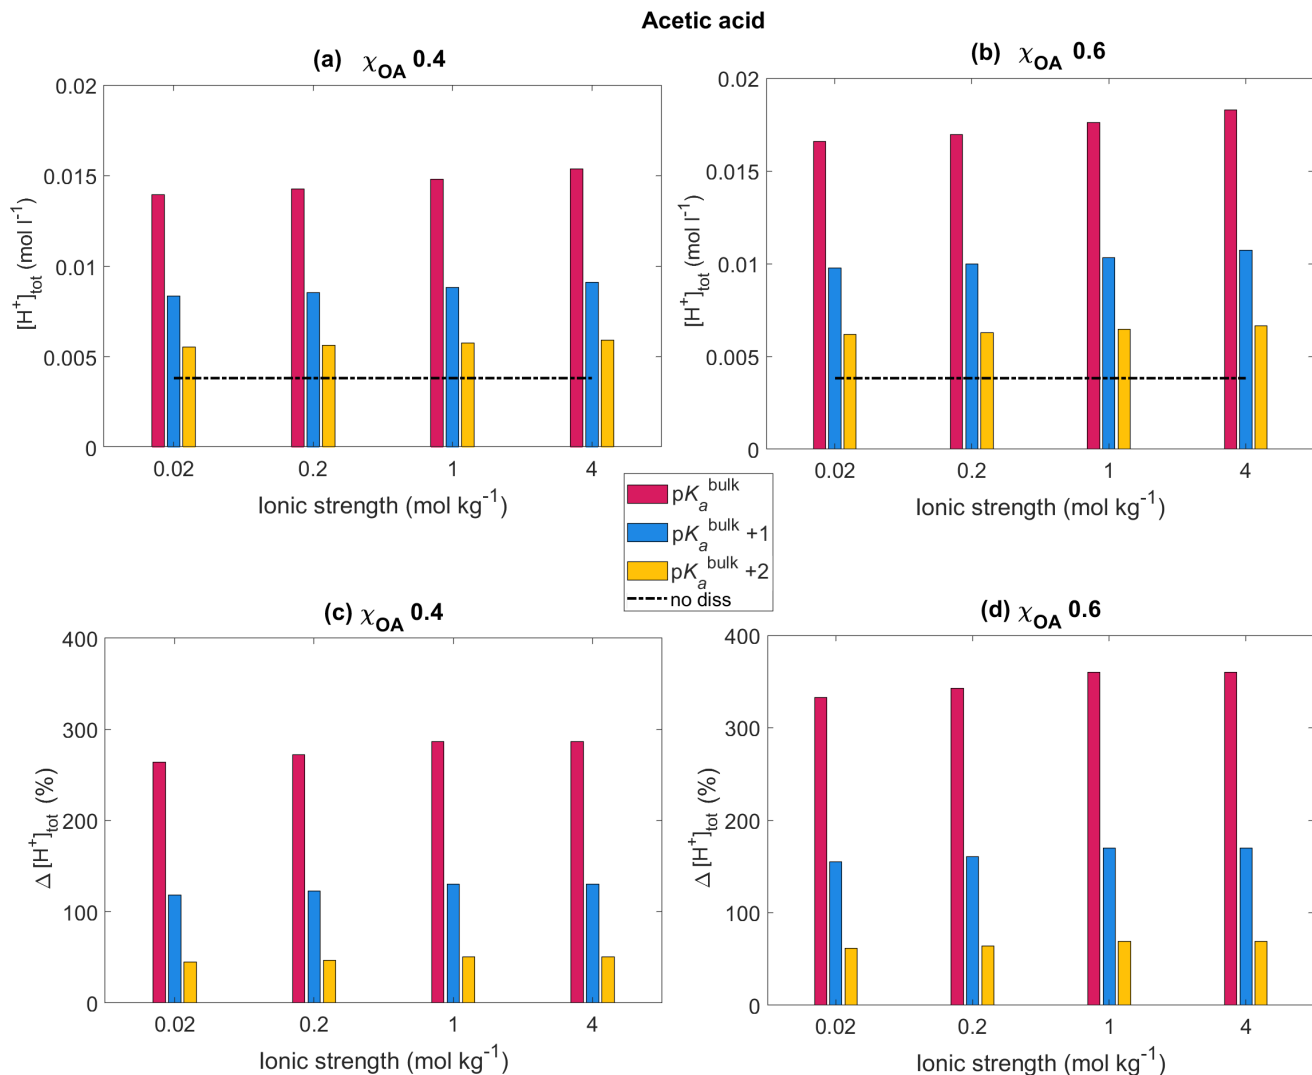

**Figure S2.** Total hydrogen ion concentration,  $[H^+]_{\text{tot}}$ , and the relative change in hydrogen ion concentration with respect to the 'no diss' ( $\Delta [H^+]_{\text{tot}}$ ) for varying ionic strengths ( $I$ ), in the aqueous aerosol population with sizes between  $D_{\text{wet}} = 0.317 - 40 \mu\text{m}$ , after 1 hour of simulation time, assuming the entire OA fraction as acetic acid and initial OA mass fractions,  $\chi_{\text{OA}} = 0.4$  (a,c) and  $0.6$  (b,d), with varying  $pK_a$  corresponding to representations of bulk ( $pK_a^{\text{bulk}}$  pink,) and surface modulated ( $pK_a^{\text{bulk}} + 1$ , blue, and  $pK_a^{\text{bulk}} + 2$ , yellow) organic acid dissociation.

### S3 Change in sulfate concentrations, $\Delta [\text{SO}_4^{2-}]''$ , with respect to 'no diss'

The relative change in sulfate concentration compared to 'no diss' is given by

$$5 \quad \Delta [\text{SO}_4^{2-}]'' = \frac{[\text{SO}_4^{2-}]'' - [\text{SO}_4^{2-}]''_0}{[\text{SO}_4^{2-}]''_0} \times 100, \quad (\text{S1})$$

where  $[\text{SO}_4^{2-}]''$  is the total sulfate concentration considering organic acid dissociation and  $[\text{SO}_4^{2-}]''_0$  is the total sulfate concentration for 'no diss'.

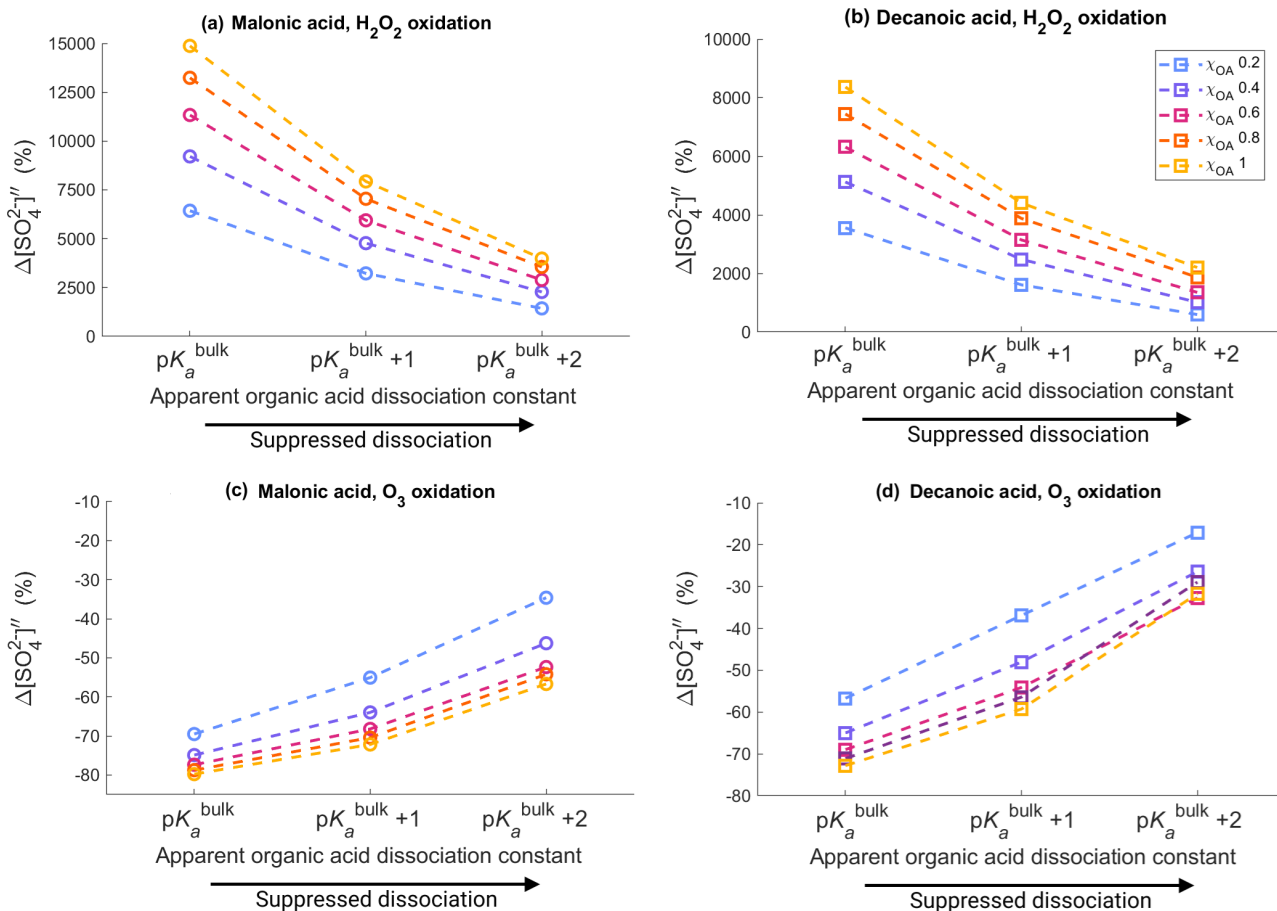

**Figure S3.** The relative change in secondary sulfate concentrations ( $\Delta[\text{SO}_4^{2-}]''$ ) from oxidation of  $\text{SO}_2$  by (a, b)  $\text{H}_2\text{O}_2$ , and (c, d)  $\text{O}_3$ , with respect to the 'no diss', in the aqueous aerosol population with sizes between  $D_{\text{wet}} = 0.317 - 40 \mu\text{m}$ , after 1 hour of simulation time, assuming the entire OA fraction as (a, c) malonic acid, and (b, d) decanoic acid, with varying  $\text{p}K_a$  corresponding to representations of bulk ( $\text{p}K_a^{\text{bulk}}$ ) and surface modulated ( $\text{p}K_a^{\text{bulk}} + 1$  and  $\text{p}K_a^{\text{bulk}} + 2$ ) organic acid dissociation, for the five different initial organic mass fractions  $\chi_{\text{OA}} = \{0.2, 0.4, 0.6, 0.8, 1\}$  considered, denoted by blue, purple, pink, orange, and yellow, respectively.

## S4 Particle size distribution with and without sulfur chemistry module

### S4.1 Malonic acid

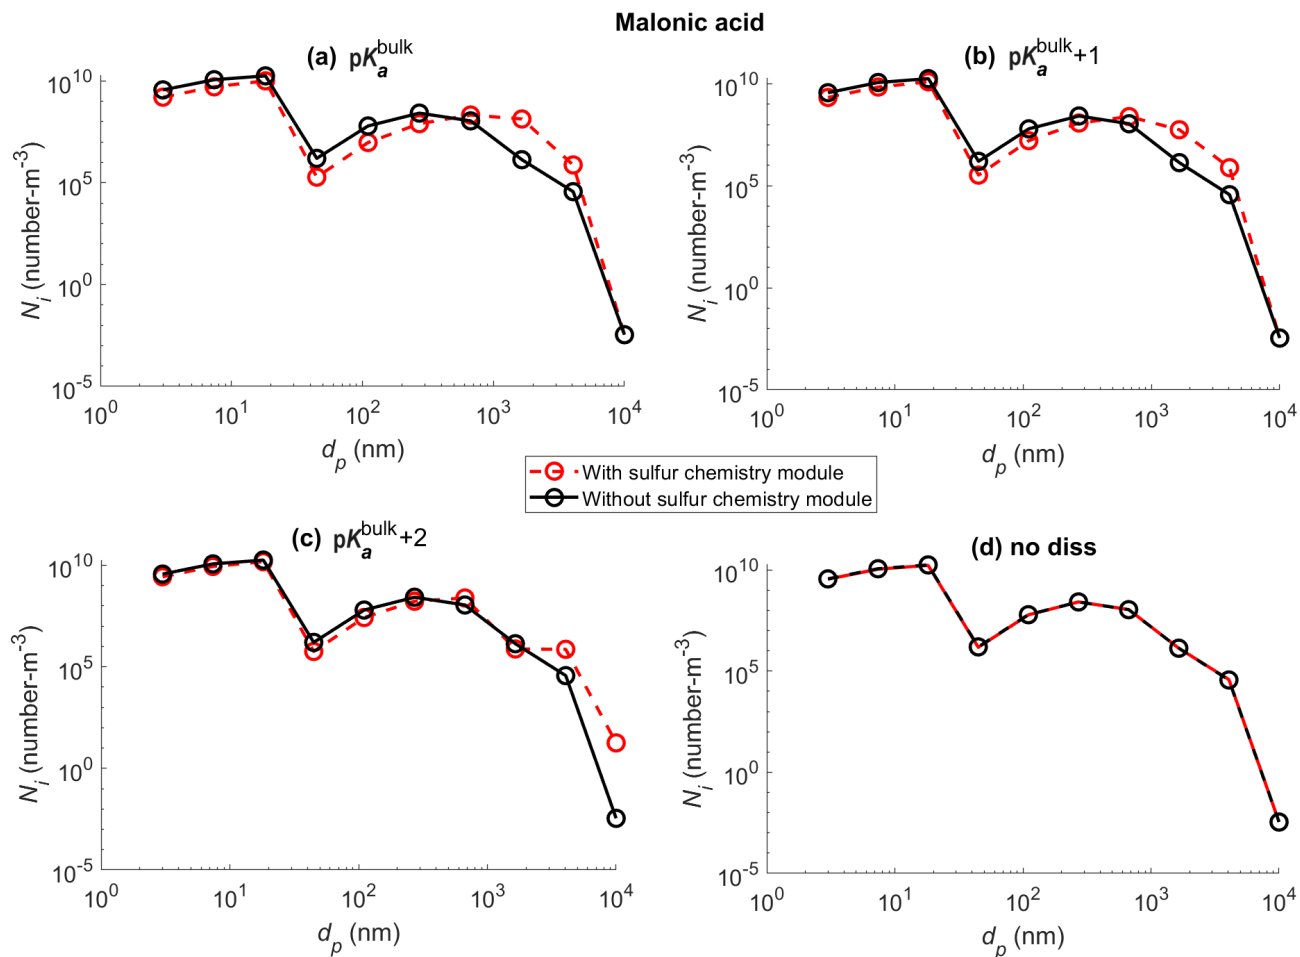

**Figure S4.** Aerosol size distribution represented by the number concentration ( $N_i$ ) as a function of particle diameter ( $d_p$ ) after 1 hour simulation time with (red) and without (black) including the sulfur chemistry module considering the entire OA fraction as malonic acid with  $\chi_{\text{OA}} = 0.8$ , assuming organic acid dissociation according to (a)  $pK_a^{\text{bulk}}$ , (b)  $pK_a^{\text{bulk}+1}$ , (c)  $pK_a^{\text{bulk}+2}$ , and (d) no diss.

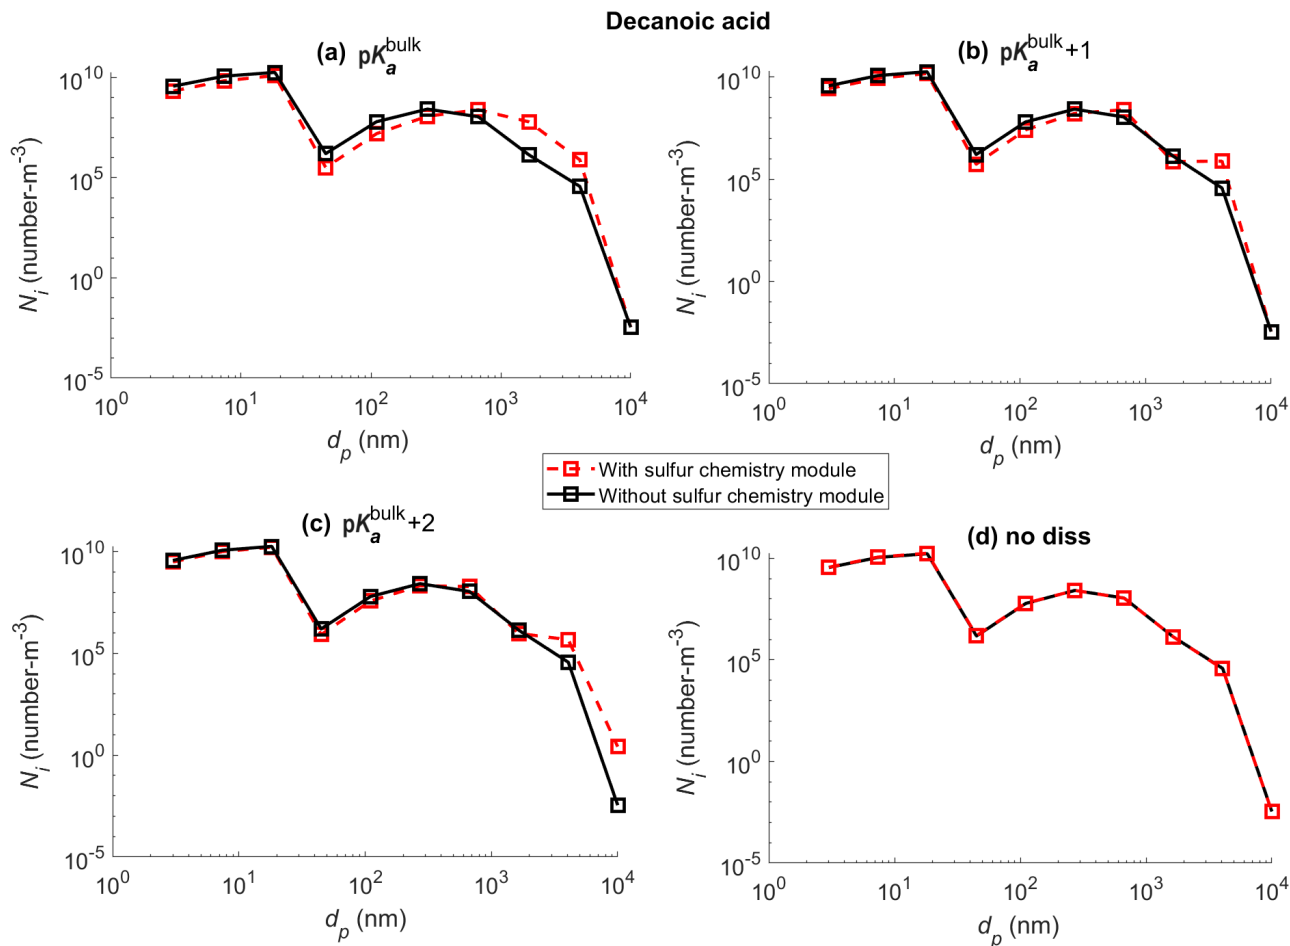

**Figure S5.** Particle size distribution represented by the number concentration ( $N_i$ ) as a function of particle diameter ( $d_p$ ) after 1 hour simulation time with (red) and without (black) including the sulfur chemistry module considering the entire OA fraction as decanoic acid with  $\chi_{\text{OA}} = 0.8$ , assuming organic acid dissociation according to (a)  $pK_a^{\text{bulk}}$ , (b)  $pK_a^{\text{bulk}} + 1$ , (c)  $pK_a^{\text{bulk}} + 2$ , and (d) no diss.

## S5 Effect on cloud properties from changes in water activity only

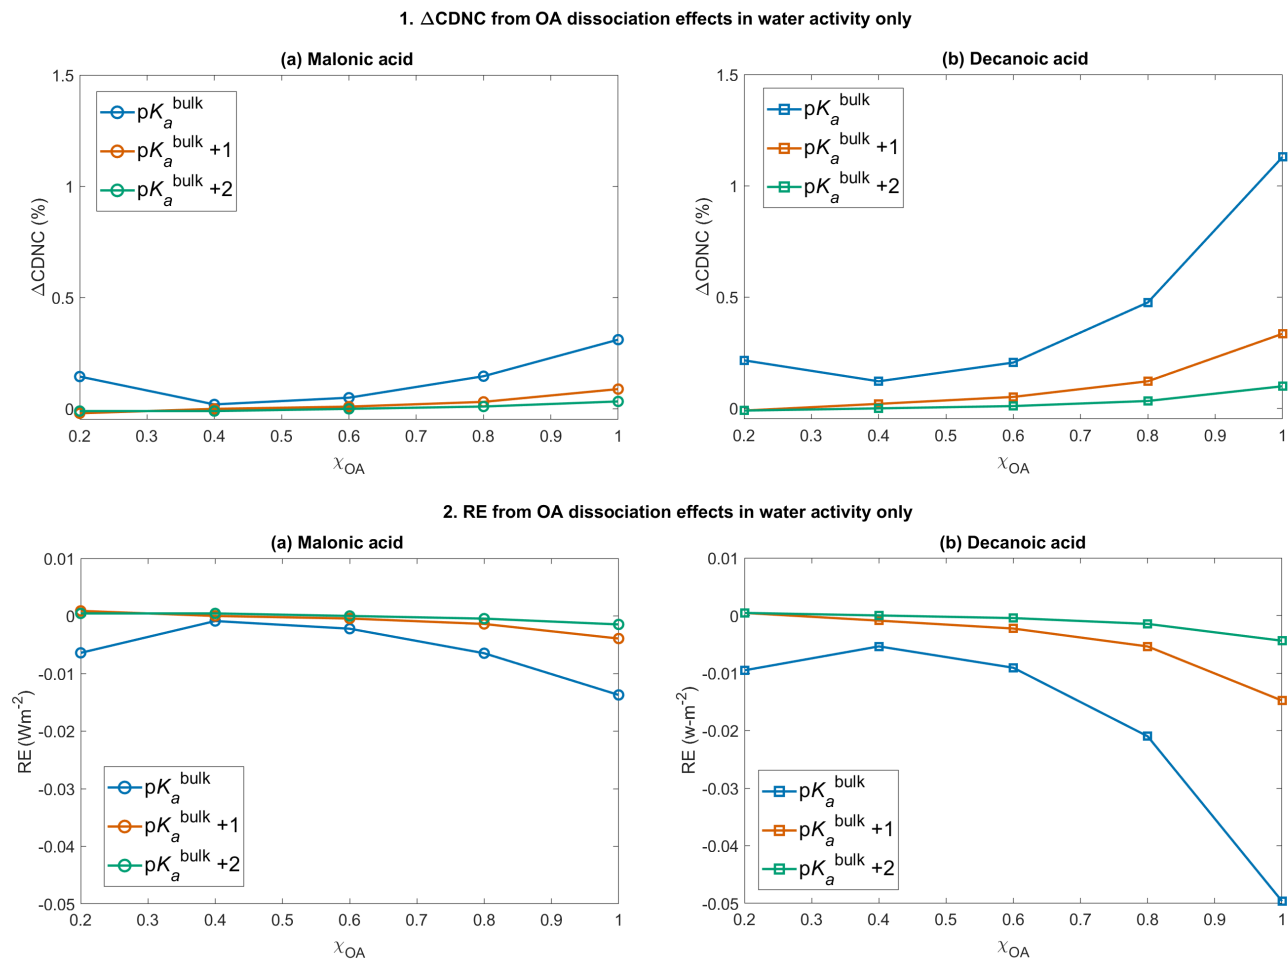

**Figure S6.** Organic acid dissociation effects in 1) cloud droplet number concentration ( $\Delta$ CDNC) and 2) the resulting short-wave radiative effect (RE) with respect to 'no diss', for varying initial organic mass fractions ( $\chi_{\text{OA}}$ ) assuming bulk organic acidity ( $pK_a^{\text{bulk}}$ , blue) and surface modulated organic acid dissociation ( $pK_a^{\text{bulk}} + 1$ , orange and  $pK_a^{\text{bulk}} + 2$ , green), from changes in van't Hoff factor and water activity only. The sulfur chemistry module has not been activated in these simulations.
